# Supplementary material
Source: PubMed Central journal article supplement (PMC2913313)

**Figure S1.** PCR-based genotyping of the DNA: the 700-bp PCR product indicates the presence of wild-type Nrf2 allele and the 400 bp PCR product the Nrf2 deleted allele. The 240-bp PCR product indicates the presence wild-type gp91 and the 195-bp PCR product the gp91 deleted allele.

Figure S1

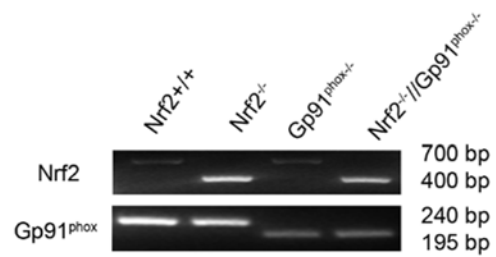

Supplement: NIHMS208181-supplement-Fig_1.pdf [file NIHMS208181-supplement-Fig_1.pdf]
